# Supplementary material for: ISG20 stimulates anti-tumor immunity via a double-stranded RNA-induced interferon response in ovarian cancer
Source: Front Immunol. 2023 Jun 5;14:1176103. doi: 10.3389/fimmu.2023.1176103 (PMC10277467; doi:10.3389/fimmu.2023.1176103)
Supplement: Supplementary file 2 [file Table_1.xlsx]

## Sheet: supplementary table1
Gene Symbol	Gene ID	Target Sequence
IFIH1	64135	CCAACAAAGAAGCAGTGTATA
DDX58	23586	CCAGAATTATCCCAACCGATA
MAVS	57506	ATGTGGATGTTGTAGAGATTC
TLR3	7098	CCTCTTCGTAACTTGACCATT
negative control		AATTCTCCGAACGTGTCACGT

## Sheet: supplementary table2
Primer	Sequnence
IFNA-F	GCCTCGCCCTTTGCTTTACT
IFNA-R	CTGTGGGTCTCAGGGAGATCA
IFNB-F	GCTTGGATTCCTACAAAGAAGCA
IFNB-R	ATAGATGGTCAATGCGGCGTC
HLAA-F	AAAAGGAGGGAGTTACACTCAGG
HLAA-R	GCTGTGAGGGACACATCAGAG
HLAB-F	CTACCCTGCGGAGATCA
HLAB-R	ACAGCCCAGGCCAGCAACA
HLAC-F	CAGAAGTACAAGCGCCAGG
HLAC-R	TAGGCGGACTGGTCATACC
B2M-F	CCACTGAAAAAGATGAGTATGCCT
B2M-R	CCAATCCAAATGCGGCATCTTCA
TAP1-F	AGGGCTGGCTGGCTGCTTTGA
TAP1-R	ACGTGGCCCATGGTGTTGTTAT
STAT1-F	ATGGCAGTCTGGCGGCTGAATT
STAT1-R	CCAAACCAGGCTGGCACAATTG
PSMB9-F	CGAGAGGACTTGTCTGCACATC
PSMB9-R	CACCAATGGCAAAAGGCTGTCG
NLRC5-F	GTCATCCGCCTCTGGAATAAC
NLRC5-R	CTGGTTGTCAAAGAAGGCAAAG
IFIT1-F	AGAAGCAGGCAATCACAGAAAA
IFIT1-R	CTGAAACCGACCATAGTGGAAAT
IFIT3-F	AAAAGCCCAACAACCCAGAAT
IFIT3-R	CGTATTGGTTATCAGGACTCAGC
ISG15-F	CGCAGATCACCCAGAAGATCG
ISG15-R	TTCGTCGCATTTGTCCACCA
IFI27-F	TGCTCTCACCTCATCAGCAGT
IFI27-R	CACAACTCCTCCAATCACAACT
TLR3-F	TTGCCTTGTATCTACTTTTGGGG
TLR3-R	TCAACACTGTTATGTTTGTGGGT
MAVS-F	CAGGCCGAGCCTATCATCTG
MAVS-R	GGGCTTTGAGCTAGTTGGCA
MDA5-F	TCGAATGGGTATTCCACAGACG
MDA5-R	GTGGCGACTGTCCTCTGAA
DDX58-F	CTGGACCCTACCTACATCCTG
DDX58-R	GGCATCCAAAAAGCCACGG
CXCL9-F	CCAGTAGTGAGAAAGGGTCGC
CXCL9-R	AGGGCTTGGGGCAAATTGTT
CXCL10-F	GTGGCATTCAAGGAGTACCTC
CXCL10-R	TGATGGCCTTCGATTCTGGATT
CXCL11-F	GACGCTGTCTTTGCATAGGC
CXCL11-R	GGATTTAGGCATCGTTGTCCTTT
ERV3-1-F	AGACCAATGGCCATGGGAAG
ERV3-1-R	ACTCCCTCTTCCTGGGCTAG
ERVK3-1-F	CAGGTGTGTGTGACCATGGA
ERVK3-1-R	CACAGGCCCACATGATTCCT
ERVH-1-F	CCTCCTGTTCTTTGCTCCGT
ERVH-1-R	AGAGGGTTTGTTCTCTGGCG
ERV9-1-F	CTTCCCCTGGCCTAGAGAGT
ERV9-1-R	CCACCCACATCCTGCTGATT
LINE1-F	CAAGCCAGAAGAGAGTGGGG
LINE1-R	ATAGGTGTGGTGTGGTGCTG

## Sheet: supplementary table3
Antibody		Cat.no
Anti-ISG20 antibody	abcam	ab157477
Mouse Anti-βtubulin mAb	ZSGB-BIO	TA-10
Mouse Anti-GAPDH mAb	ZSGB-BIO	TA-08
Mouse anti double-stranded RNA(J2)	Nordic-Mubio	10010200
RIG-I/DDX58 Rabbit pAb	Abclonal	A0550
MDA5/IFIH1 Rabbit mAb	Abclonal	A2419
MAVS Rabbit pAb	Abclonal	A5764
STAT1 Rabbit mAb	Abclonal	A19563
Phospho-STAT1-Y701 Rabbit mAb	Abclonal	AP0054
STAT2 Rabbit mAb	Abclonal	A3588
TLR3 Rabbit pAb	Abclonal	A11778
Recombinant Anti-CD8 alpha antibody [SP239]	abcam	ab178089
Anti-ISG20 antibody	abcam	ab157477
Anti-HLA A antibody	abcam	ab52922
Goat Anti-Mouse IgG H&L(HRP)	abcam	ab6789
Goat Anti-Rabbit IgG H&L(HRP)	abcam	ab6721
Goat Anti-Mouse IgG H&L(HRP)	abcam	ab150114
